# Supplementary material
Source: publisher site journal article supplement (http://www.dovepress.com/get_supplementary_file.php?f=231908.xlsx)
Supplement: Supplementary file 1 [file get_supplementary_file.php]

## Sheet: Sheet1
Supplementary material 1: The preliminary experiments of baicalin treatment
		air sac lesion		tracheal lesion		SPA		tracheal mucosal
Treatment	dpia	Number positiveb	Mean scorec	Number positive	Mean score	Number positive	Mean score	Mean thicknessd
Control	1	0/8	0	2/8	0.13±0.18	0/8	0	32.53±6.44
	4	0/8	0	3/8	0.19±0.23	0/8	0	38.16±6.38
	7	0/8	0	2/8	0.13±0.18	0/8	0	48.52±14.30
Tylosin	1	0/8	0	2/8	0.19±0.13	2/8	0.25±0.46	36.82±8.98
	4	3/8	0.38±0.52	4/8	0.38±0.37	6/8	0.88±0.64	43.06±8.58
	7	4/8	0.86±0.54	5/8	0.75±0.47	7/8	1.93±0.74	53.53±12.06
Baicalin High	1	4/8	0.50±0.54	3/8	0.19±0.26	5/8	0.75±0.70	41.16±10.05
	4	5/8	0.88±0.76	7/8	0.81±0.59	8/8	2.0±0.54	54.84±24.32
	7	8/8	0.93±0.64	8/8	0.79±0.70	8/8	2.15±0.71	59.34±16.10
Baicalin median	1	6/8	0.75±0.46	6/8	0.50±0.38	8/8	2.0±0.76	62.86±23.66
	4	8/8	2.13±0.64	8/8	1.44±0.82	8/8	2.38±0.52	68.93±27.26
	7	7/7	2.56±0.54	7/7	2.43±0.79	7/7	2.71±0.49	78.38±18.59
Baicalin low	1	7/8	1.13±0.64	6/8	0.56±0.41	8/8	2.25±0.89	64.79±22.64
	4	8/8	2.25±0.47	8/8	1.56±0.82	8/8	2.71±0.49	68.75±16.72
	7	7/7	2.71±0.49	7/7	2.29±0.76	7/7	2.63±0.52	71.92±26.66
a Days post infection. b Number of positive (non-zero) chickens/total chickens. c Mean of positive (non-zero) scores ± standard deviation. d Mean thickness(μm) ± standard deviatio
Chickens in the control group were fed only with basal diet and were direct air sac inoculation with the culture medium 0.2 mL on day 7.The MG infection model was constructed one time by direct air sac inoculation with 1×109 CCU/mL MG R strain 0.2 mL on day 7. There are four treatment groups.The tylosin group were treated with baicalin mixed water (100 mg/kg) by gavage begin on day 10 and continu…
